# Supplementary material
Source: Springer Nature journal article supplement (https://www.springermedizin.de/resource/supplementary/12884_2013_842_MOESM5_ESM.pdf/9458334)
Supplement: MOESM5 [file 9458334]

**Forest plots of Comparisons 1-5.** *\*Please note: Forest plots have been presented only for outcomes that were reported by more than one study*

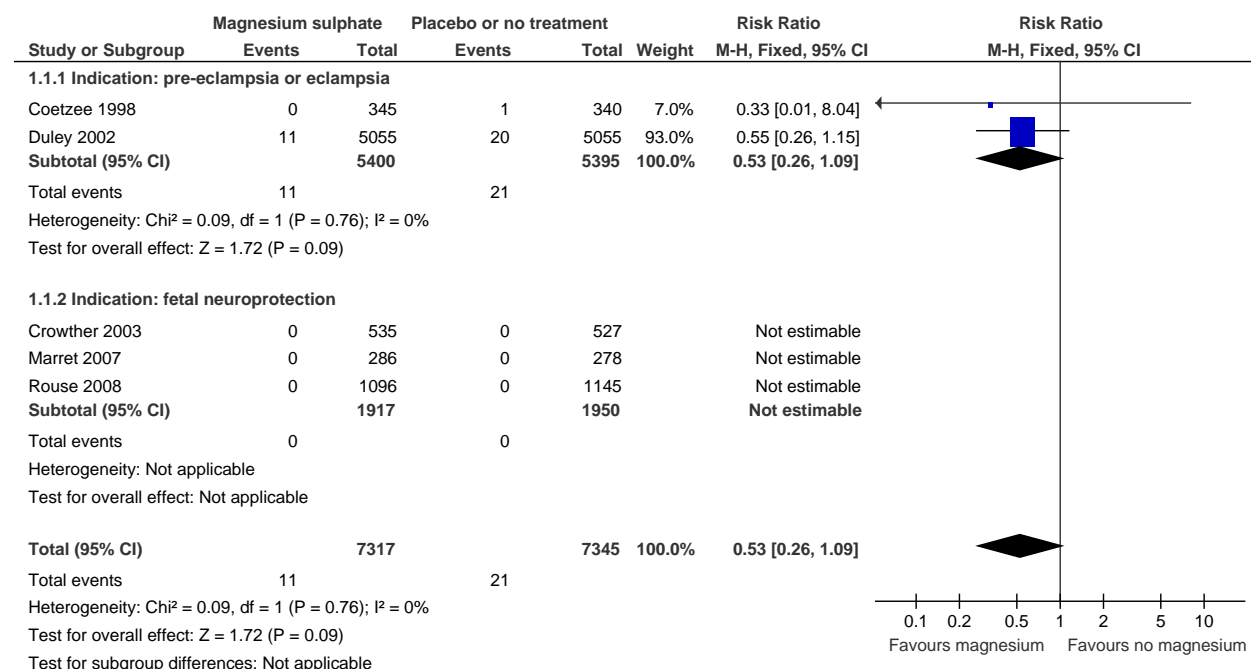

**Figure A1. Forest plot of Comparison: 1 Magnesium sulphate vs. placebo/no treatment, outcome: 1.1 Death**

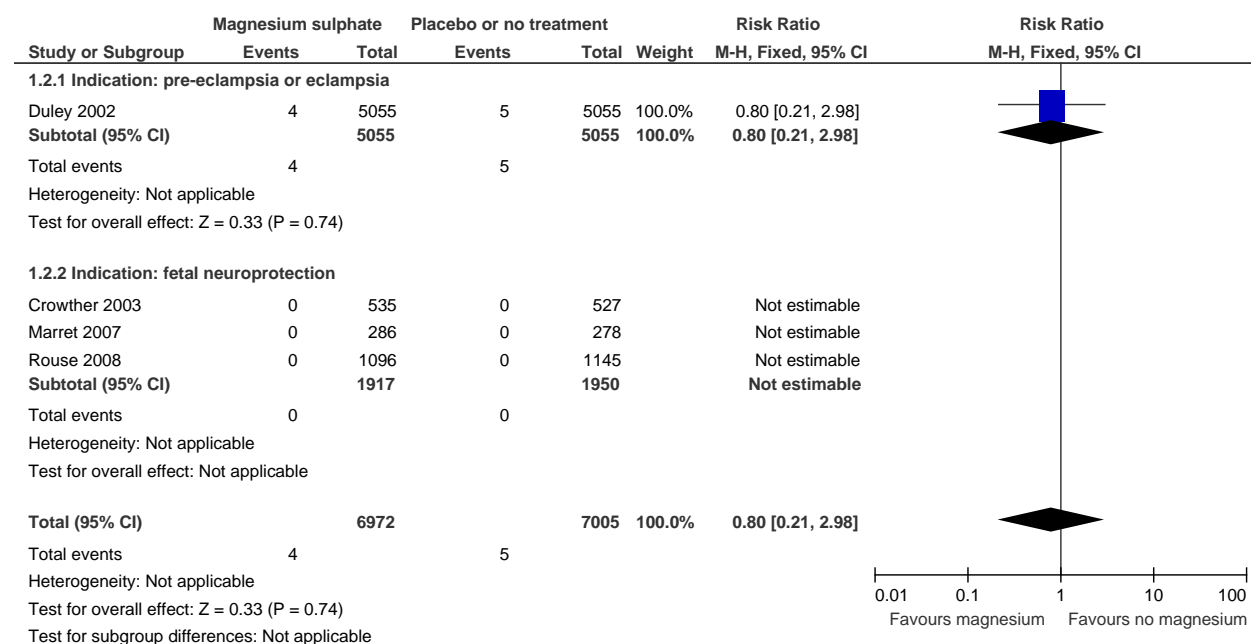

**Figure A2. Forest plot of Comparison: 1 Magnesium sulphate vs. placebo/no treatment, outcome: 1.2 Cardiac arrest**

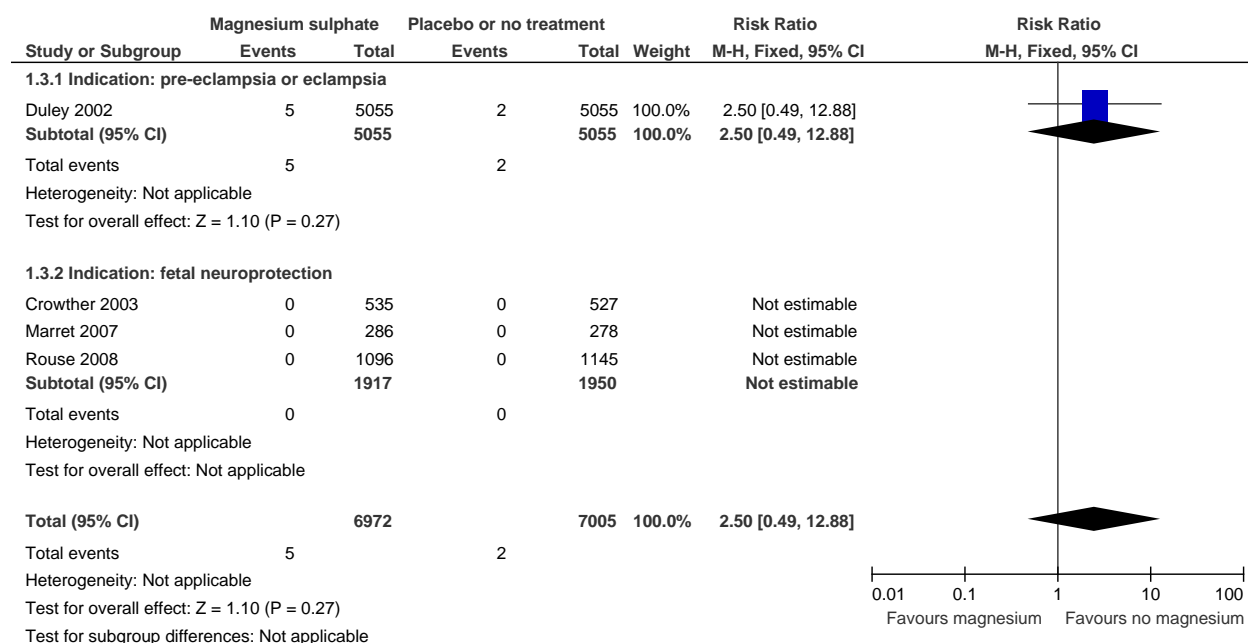

**Figure A3. Forest plot of Comparison: 1 Magnesium sulphate vs. placebo/no treatment, outcome: 1.3 Respiratory arrest**

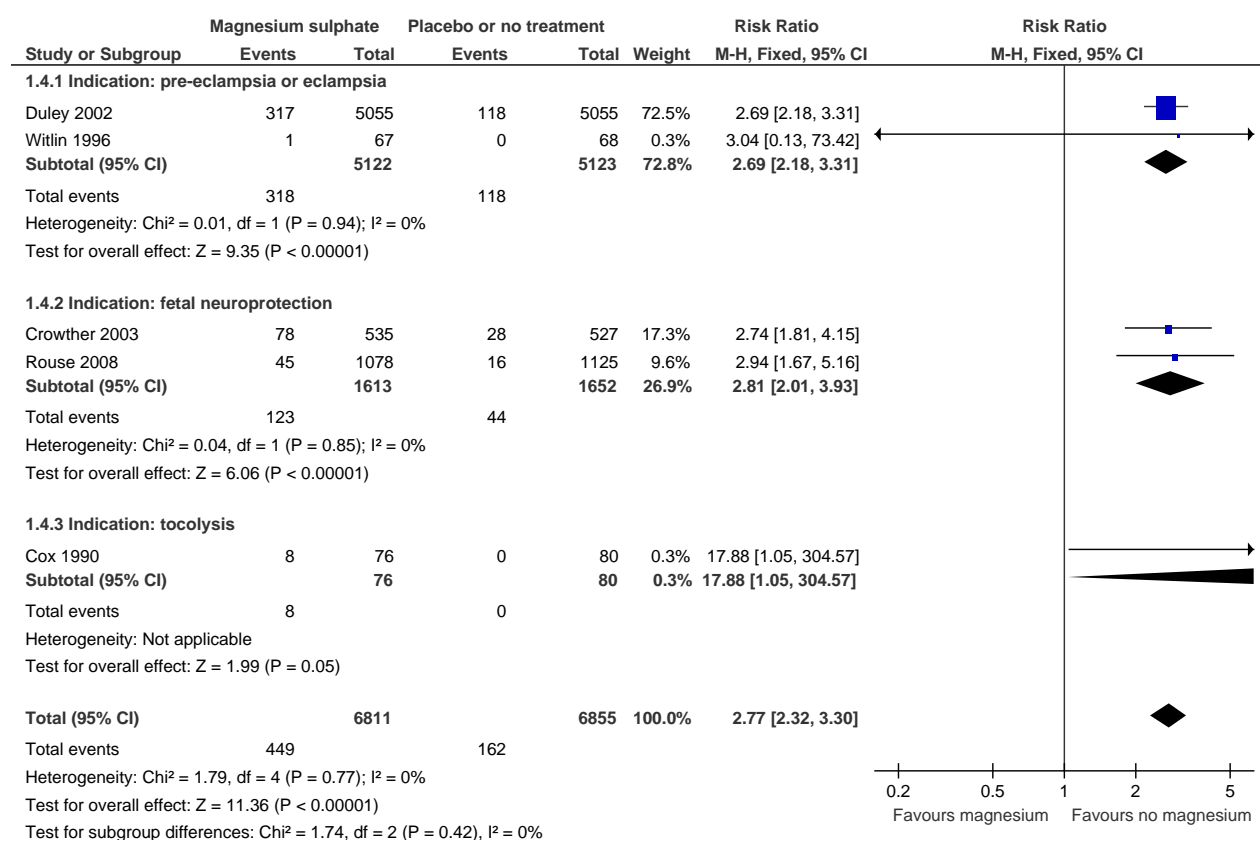

**Figure A4. Forest plot of Comparison: 1 Magnesium sulphate vs. placebo/no treatment, outcome: 1.4 Discontinuation due to adverse effects**

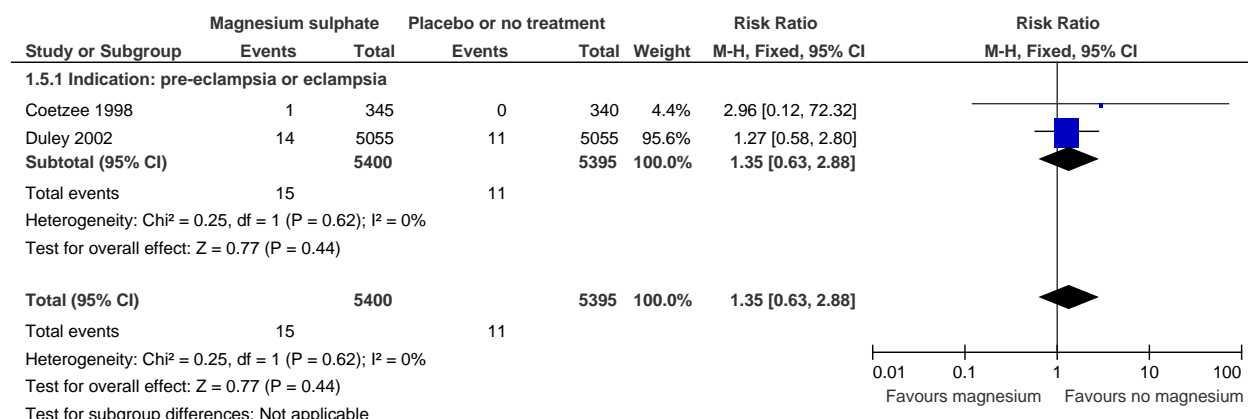

**Figure A5. Forest plot of Comparison: 1 Magnesium sulphate vs. placebo/no treatment, outcome: 1.5 Given calcium gluconate**

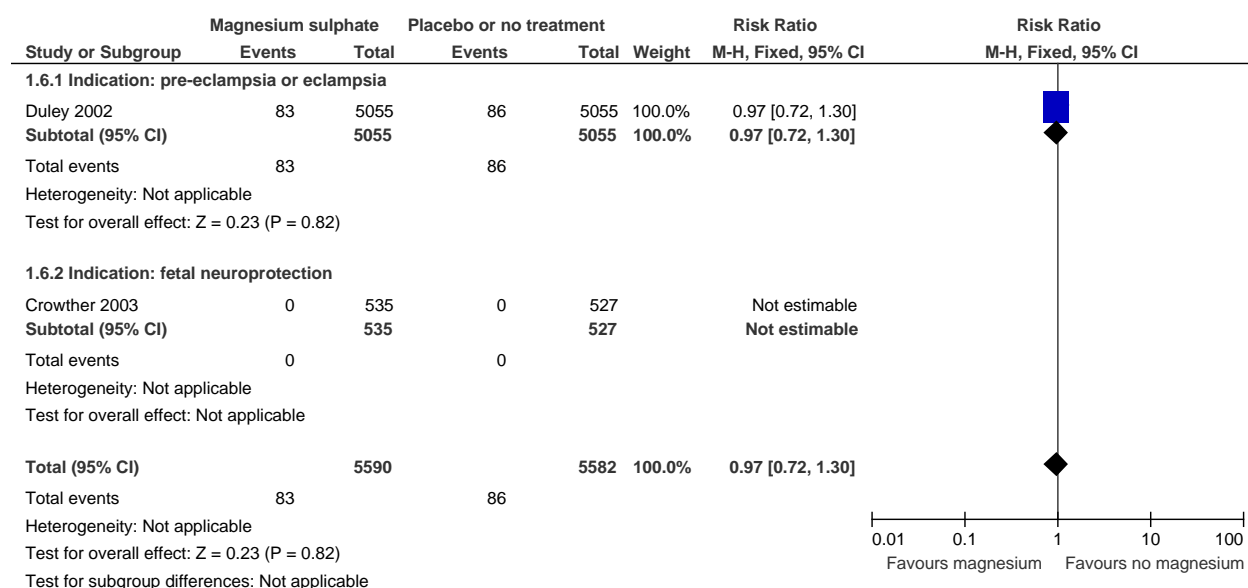

**Figure A6. Forest plot of Comparison: 1 Magnesium sulphate vs. placebo/no treatment, outcome: 1.6 ICU admission**

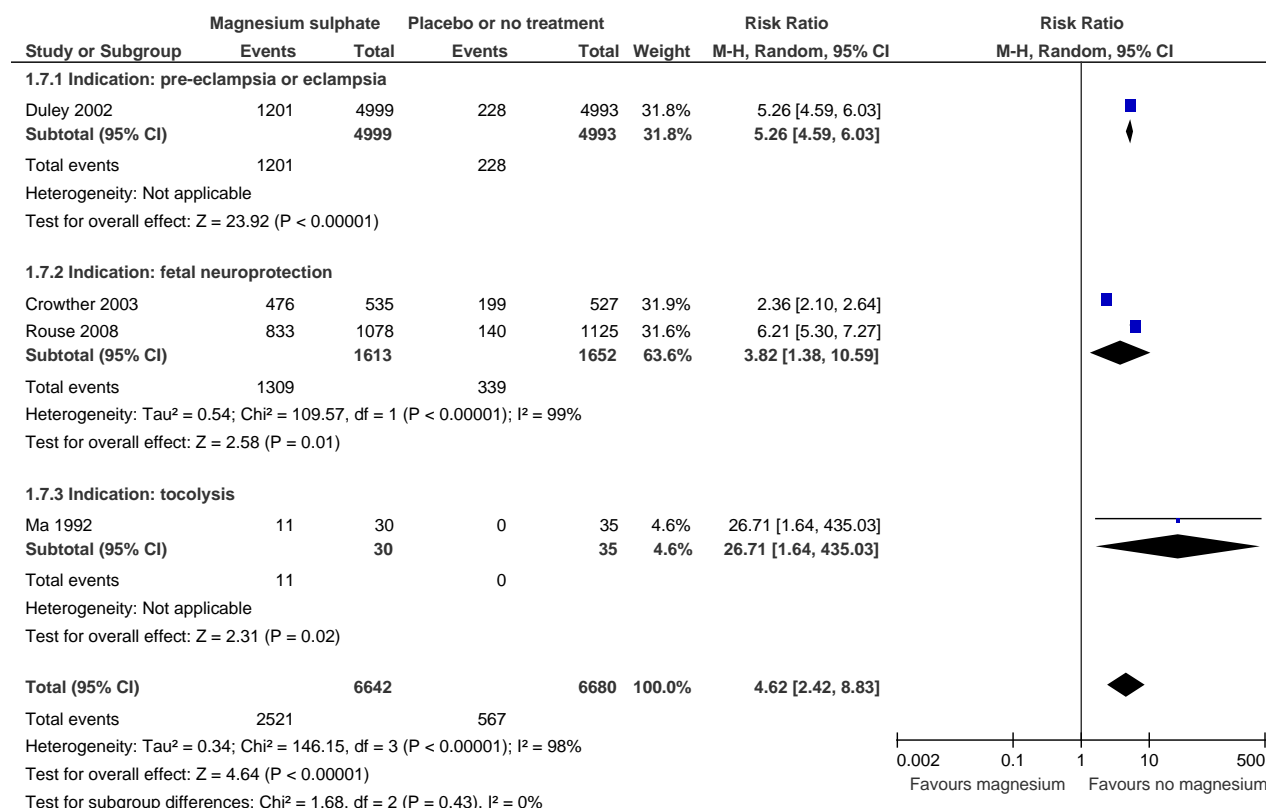

**Figure A7. Forest plot of Comparison: 1 Magnesium sulphate vs. placebo/no treatment, outcome: 1.7 Any adverse effects**

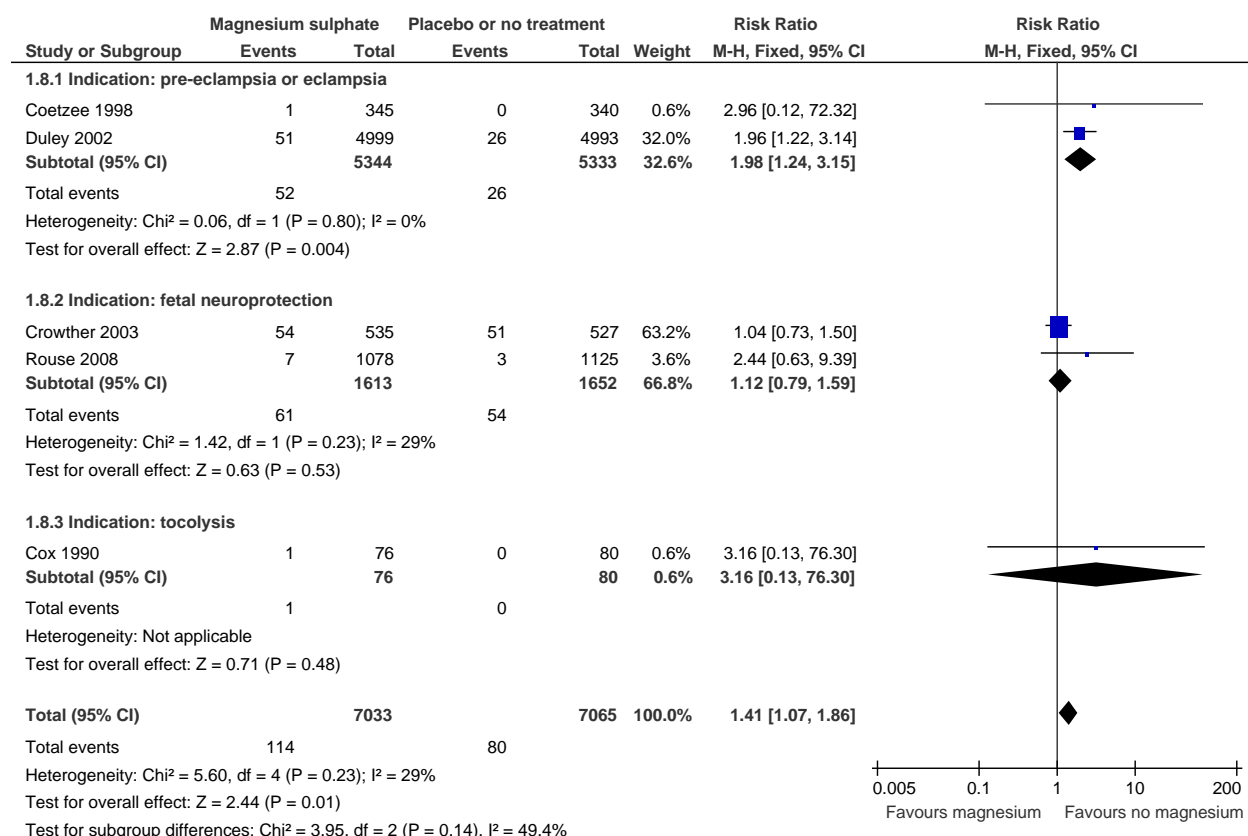

**Figure A8. Forest plot of Comparison: 1 Magnesium sulphate vs. placebo/no treatment, outcome: 1.8 Respiratory depression or other respiratory problems**

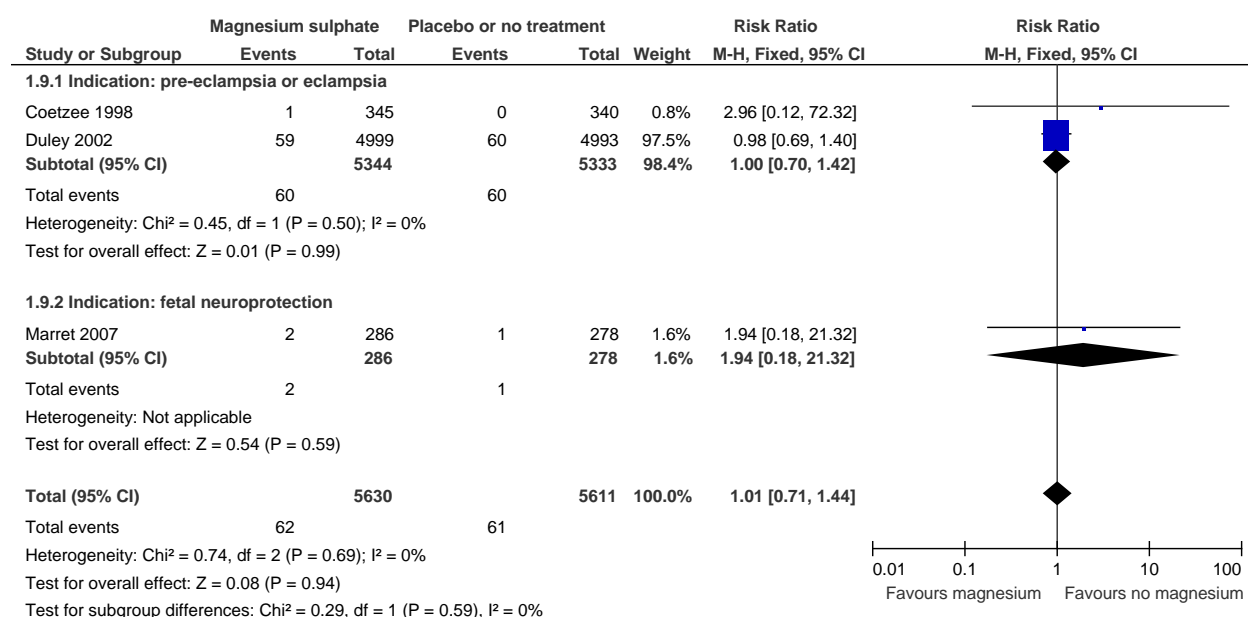

**Figure A9. Forest plot of Comparison: 1 Magnesium sulphate vs. placebo/no treatment, outcome: 1.9 Absent or reduced tendon reflexes**

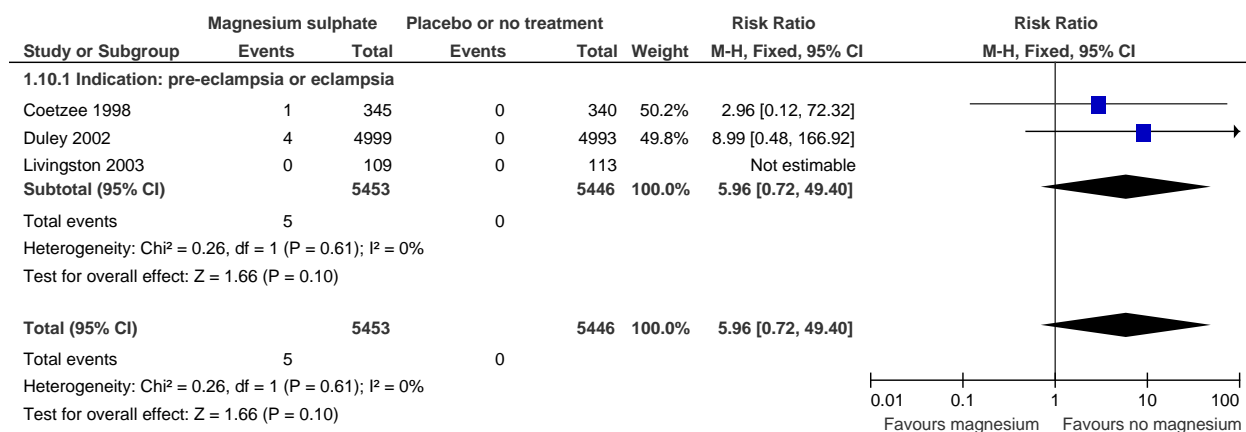

**Figure A10. Forest plot of Comparison: 1 Magnesium sulphate vs. placebo/no treatment, outcome: 1.10 Respiratory depression and absent reflexes**

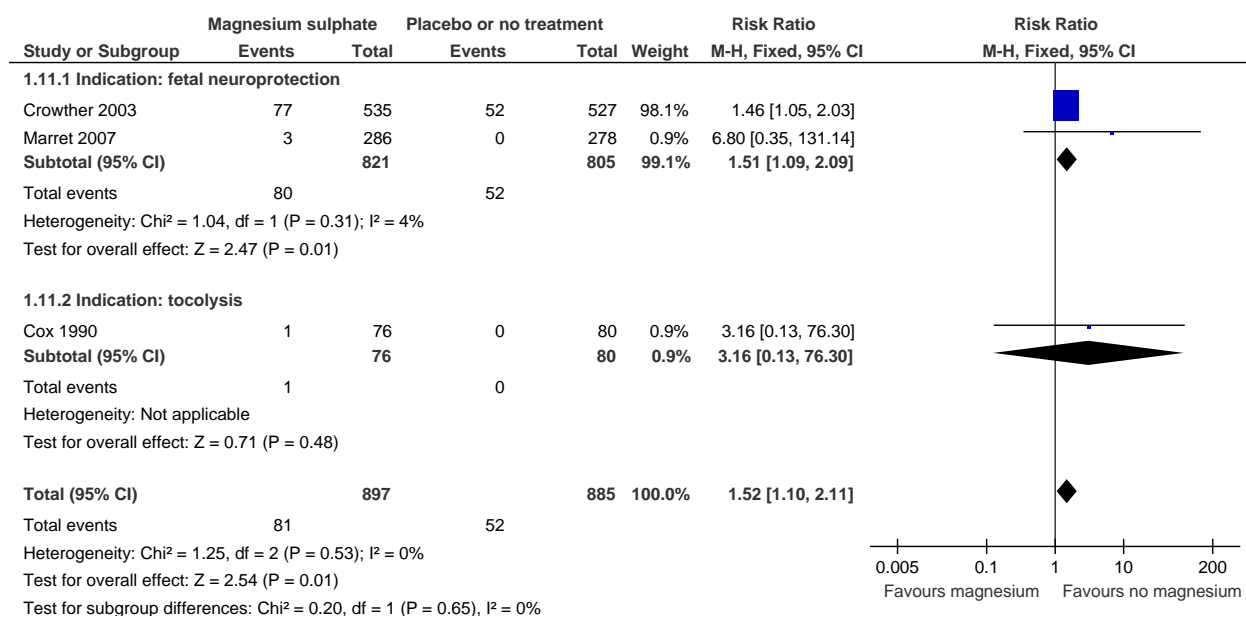

**Figure A11. Forest plot of Comparison: 1 Magnesium sulphate vs. placebo/no treatment, outcome: 1.11 Hypotension**

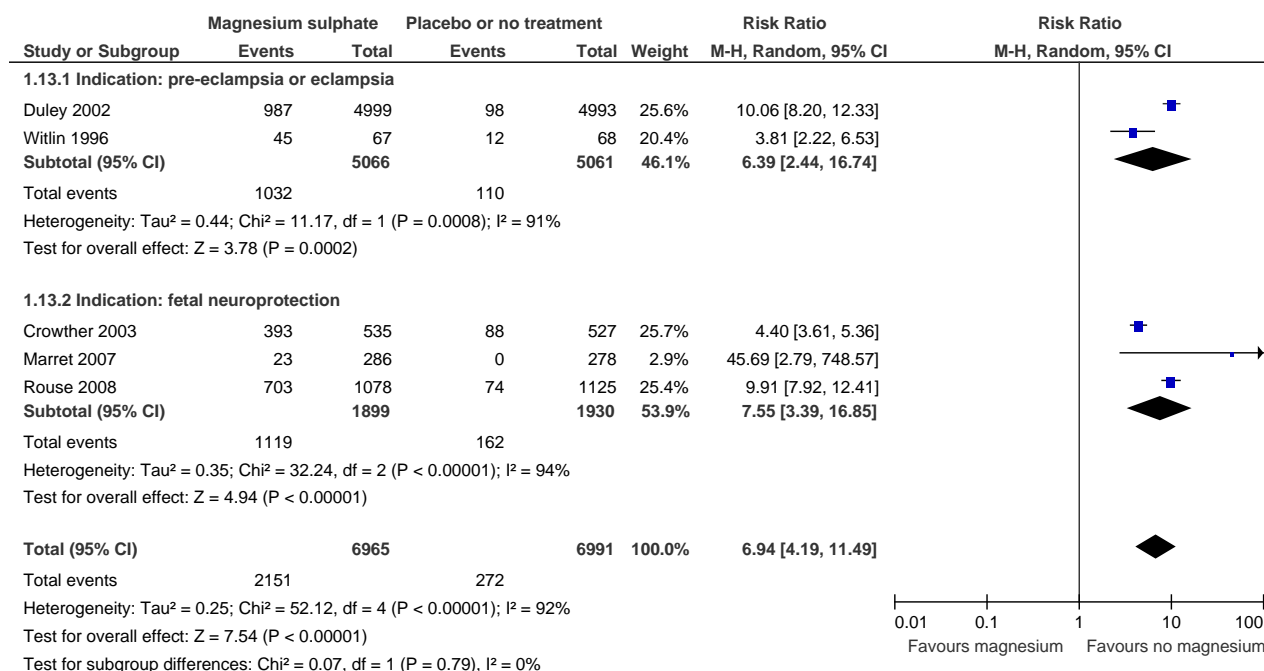

**Figure A12. Forest plot of Comparison: 1 Magnesium sulphate vs. placebo/no treatment, outcome: 1.13 Flushing or warmth**

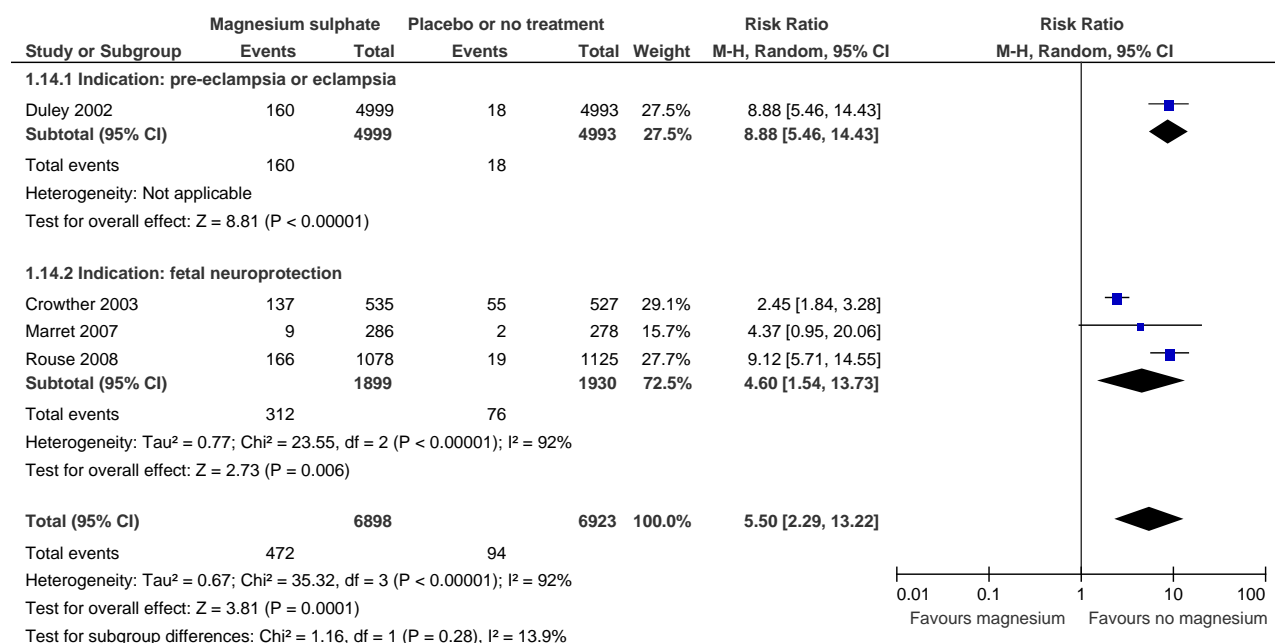

**Figure A13. Forest plot of Comparison: 1 Magnesium sulphate vs. placebo/no treatment, outcome: 1.14 Nausea and/or vomiting**

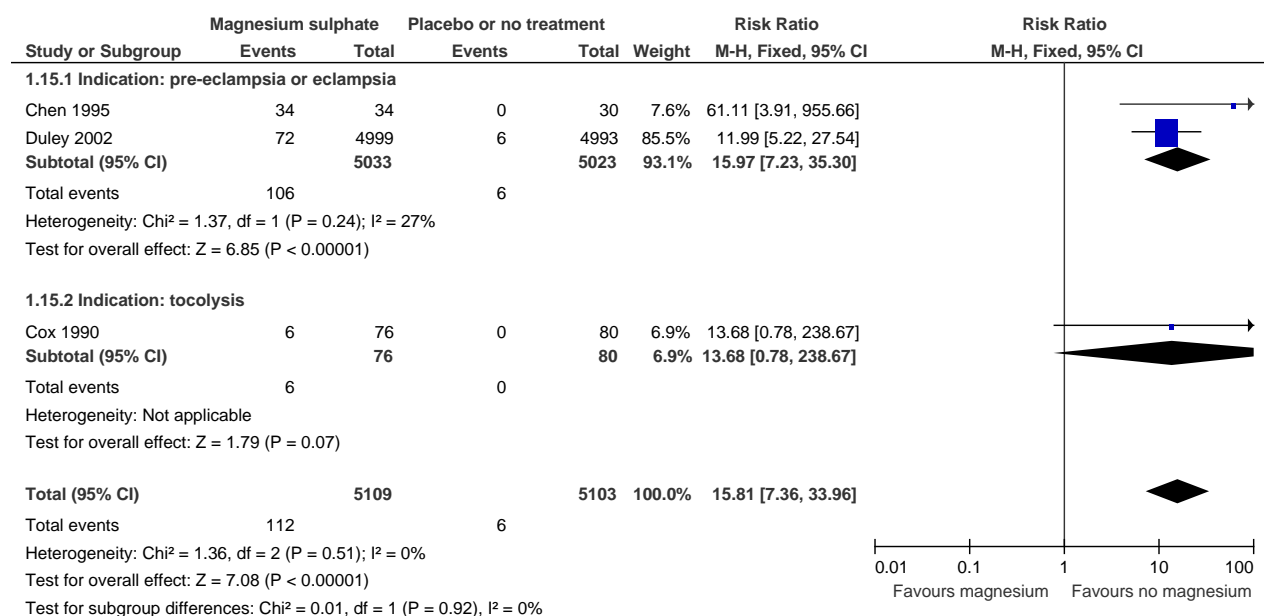

**Figure A14. Forest plot of Comparison: 1 Magnesium sulphate vs. placebo/no treatment, outcome: 1.15 Muscle weakness**

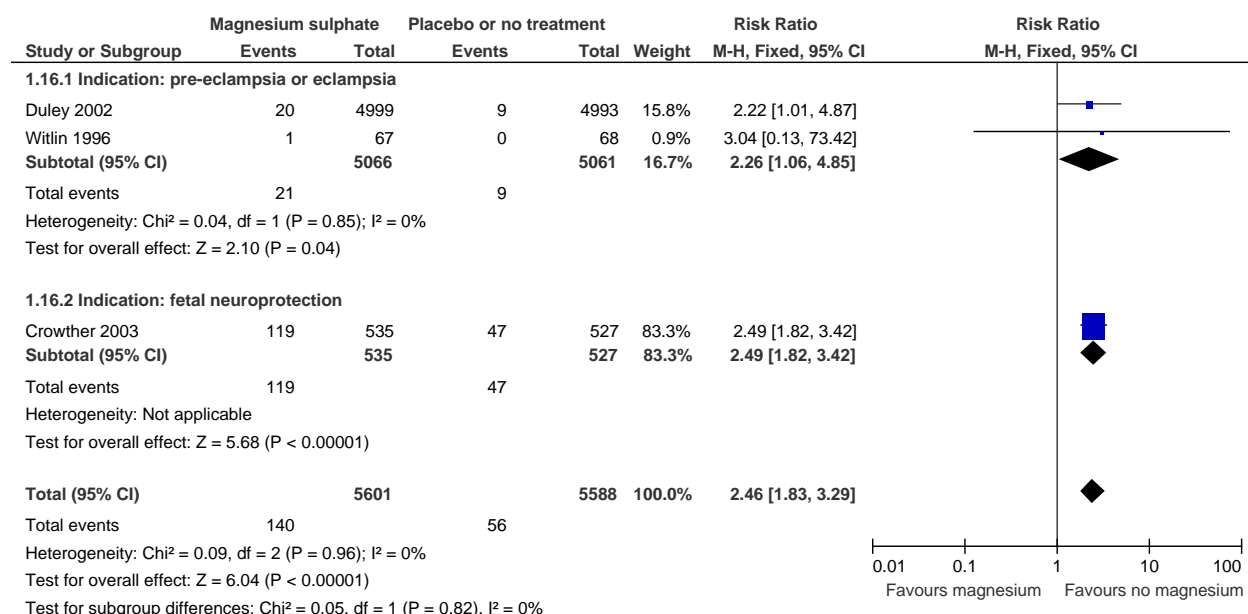

**Figure A15. Forest plot of Comparison: 1 Magnesium sulphate vs. placebo/no treatment, outcome: 1.16 Drowsiness or confusion**

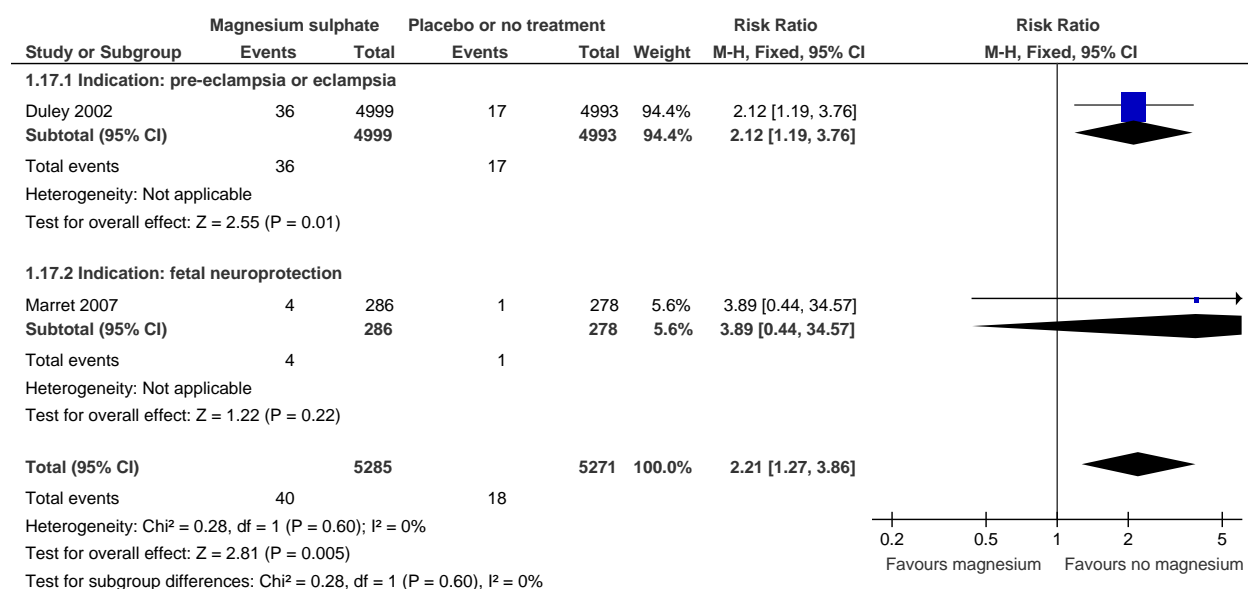

**Figure A16. Forest plot of Comparison: 1 Magnesium sulphate vs. placebo/no treatment, outcome: 1.17 Headache.**

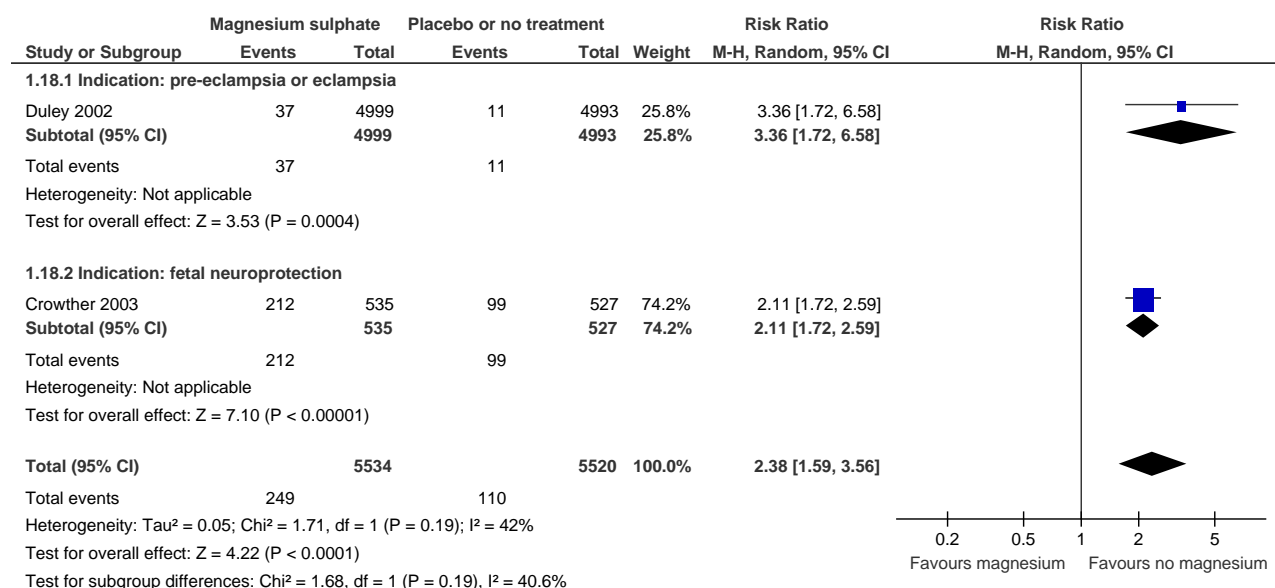

**Figure A17. Forest plot of Comparison: 1 Magnesium sulphate vs. placebo/no treatment, outcome: 1.18 Thirst/mouth dryness.**

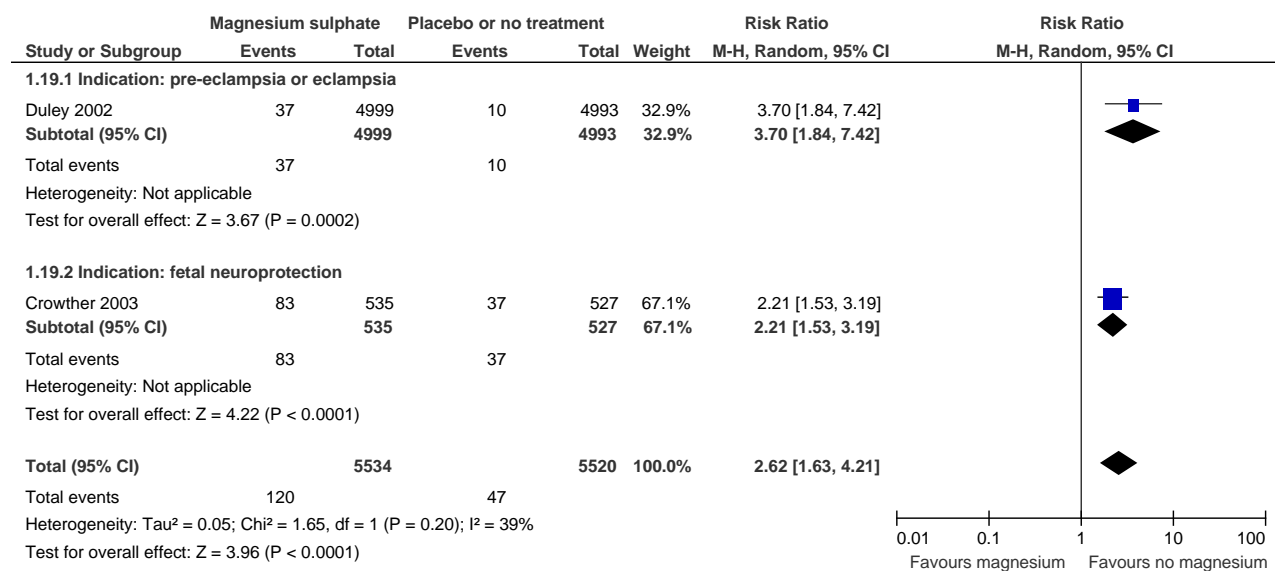

**Figure A18. Forest plot of Comparison: 1 Magnesium sulphate vs. placebo/no treatment, outcome: 1.19 Dizziness**

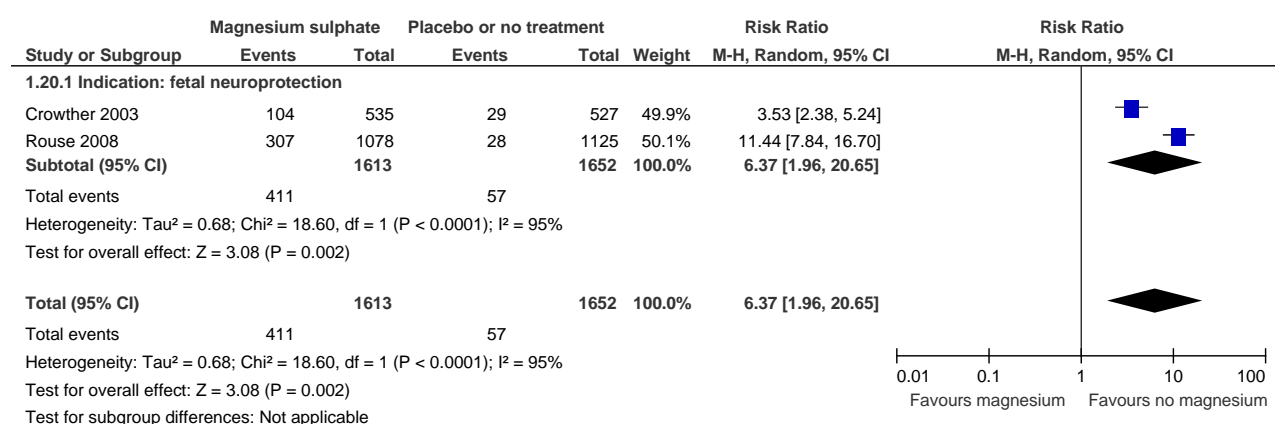

**Figure A19. Forest plot of Comparison: 1 Magnesium sulphate vs. placebo/no treatment, outcome: 1.20 Sweating**

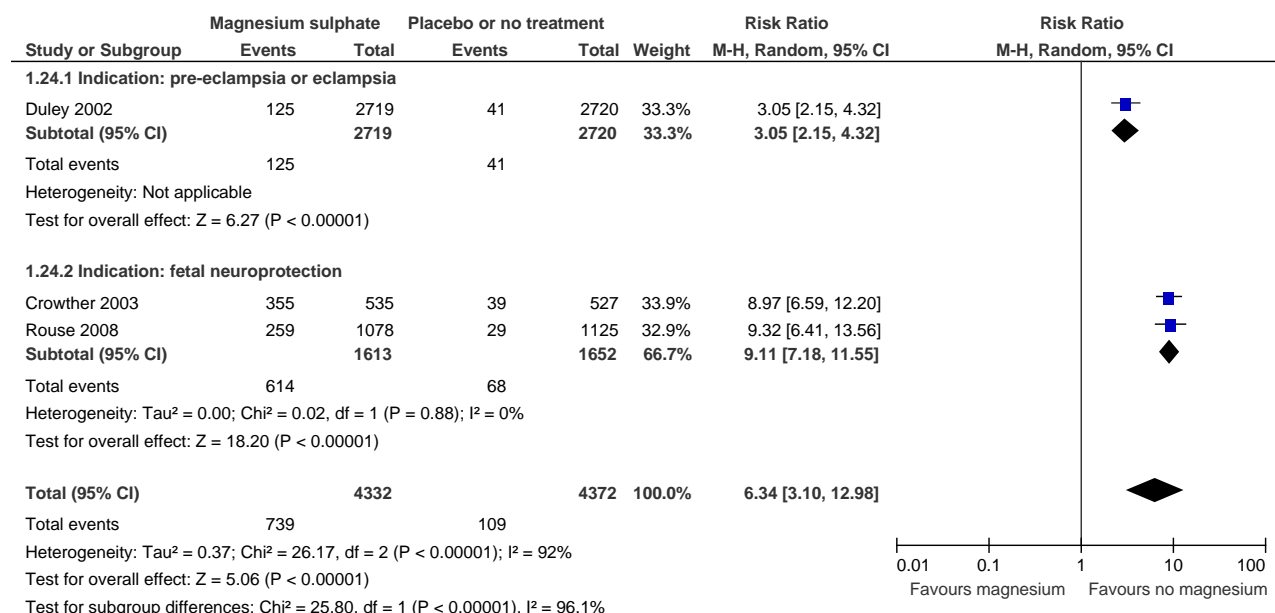

**Figure A20. Forest plot of Comparison: 1 Magnesium sulphate vs. placebo/no treatment, outcome: 1.24 Problems at IV site/arm discomfort.**



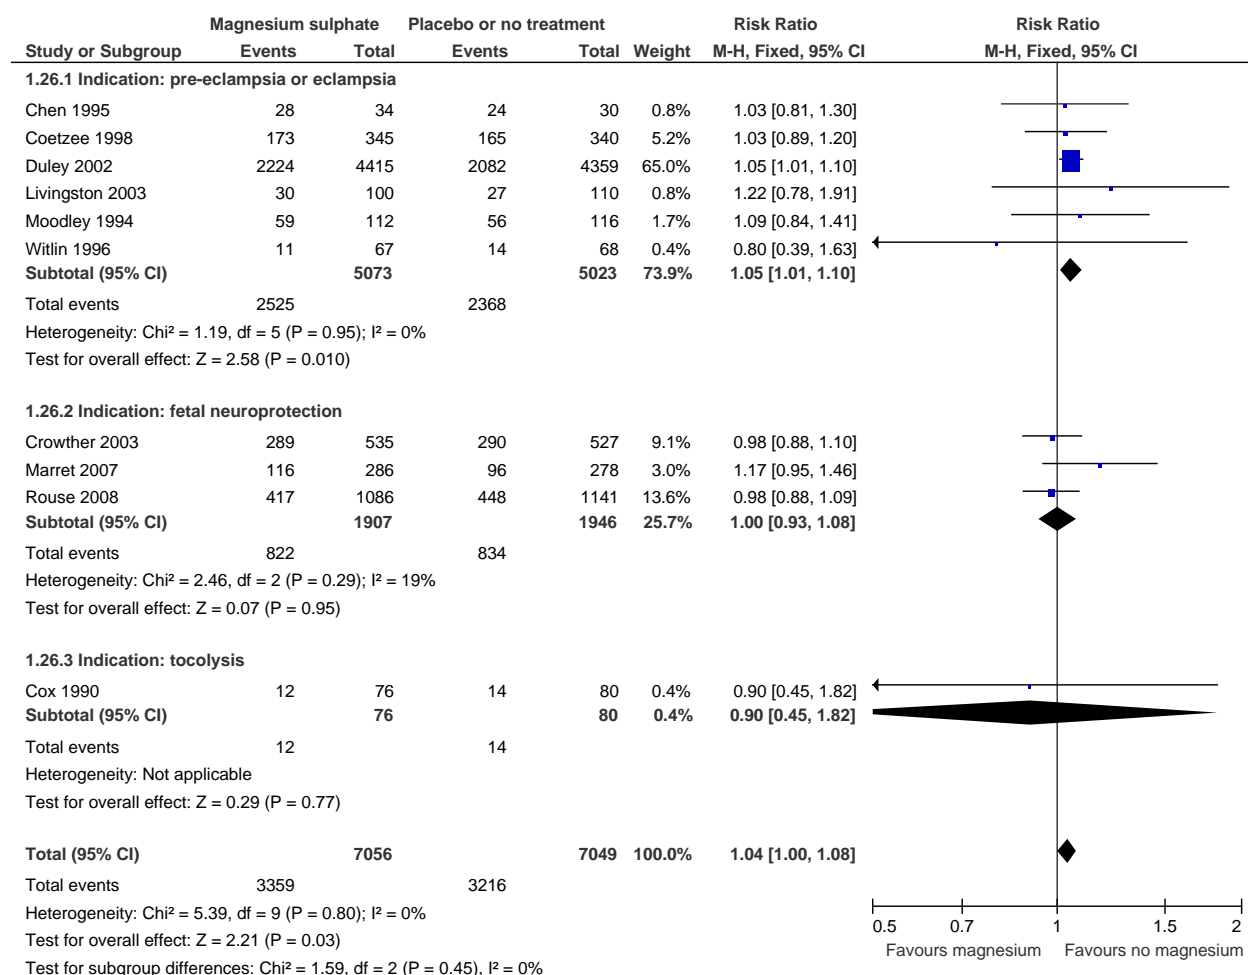

**Figure A21. Forest plot of Comparison: 1 Magnesium sulphate vs. placebo/no treatment, outcome: 1.26 Caesarean**

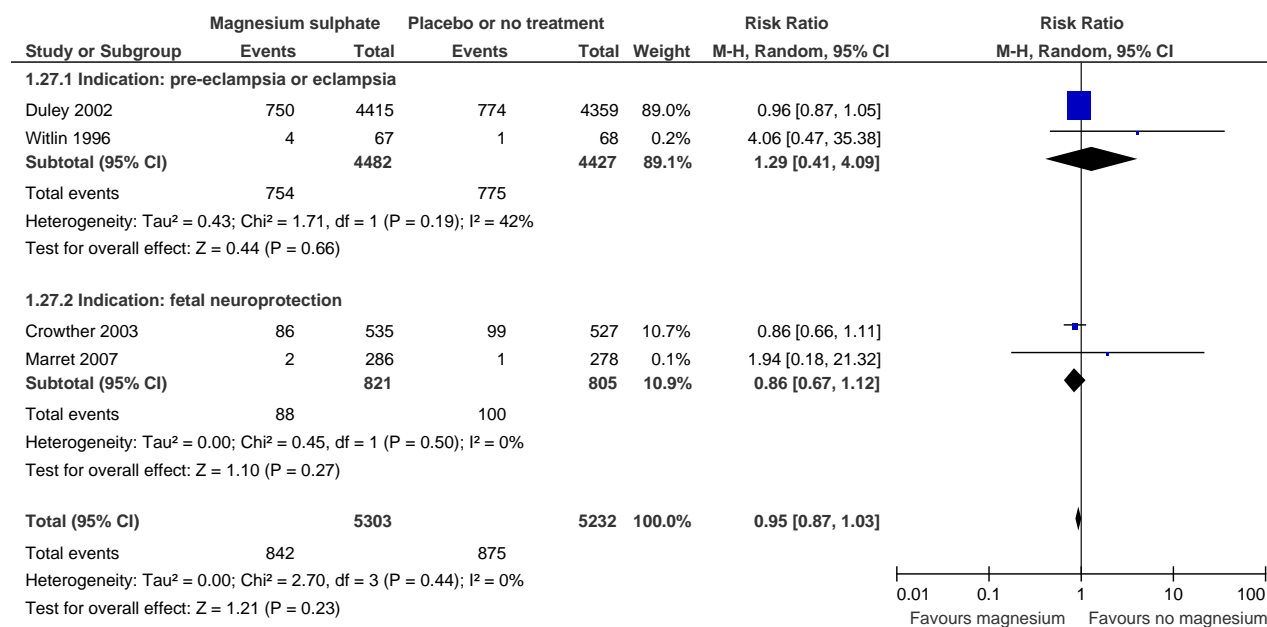

**Figure A22. Forest plot of Comparison: 1 Magnesium sulphate vs. placebo/no treatment, outcome: 1.27 Postpartum haemorrhage**

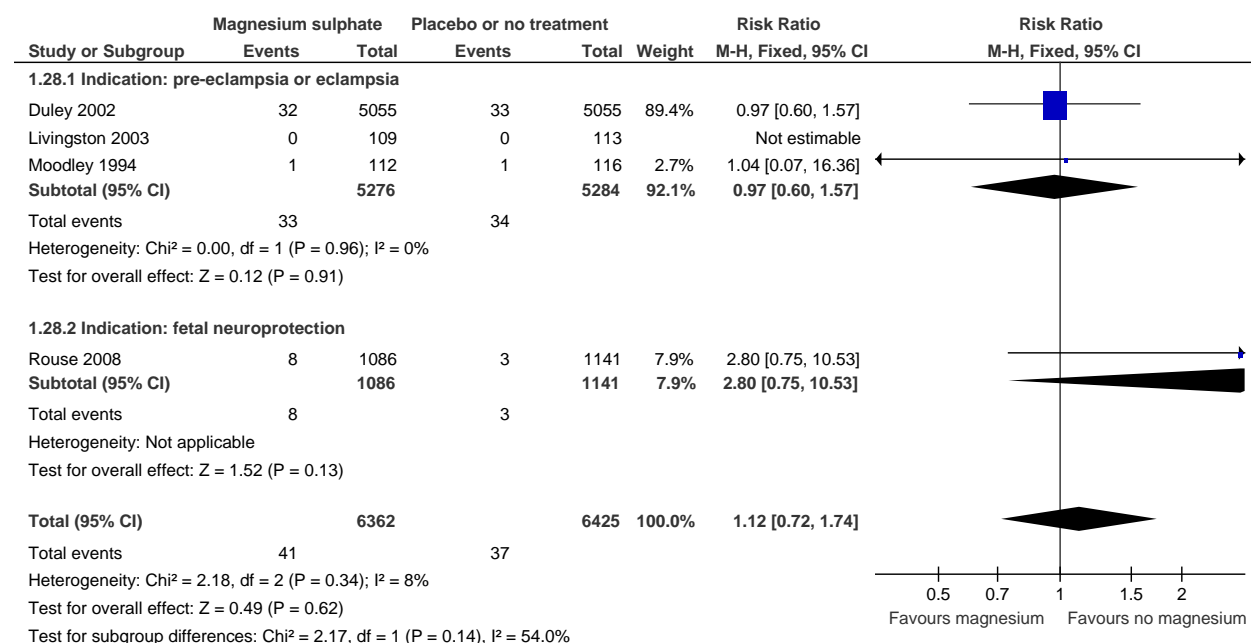

**Figure A23. Forest plot of Comparison: 1 Magnesium sulphate vs. placebo/no treatment, outcome: 1.28 Pulmonary oedema**

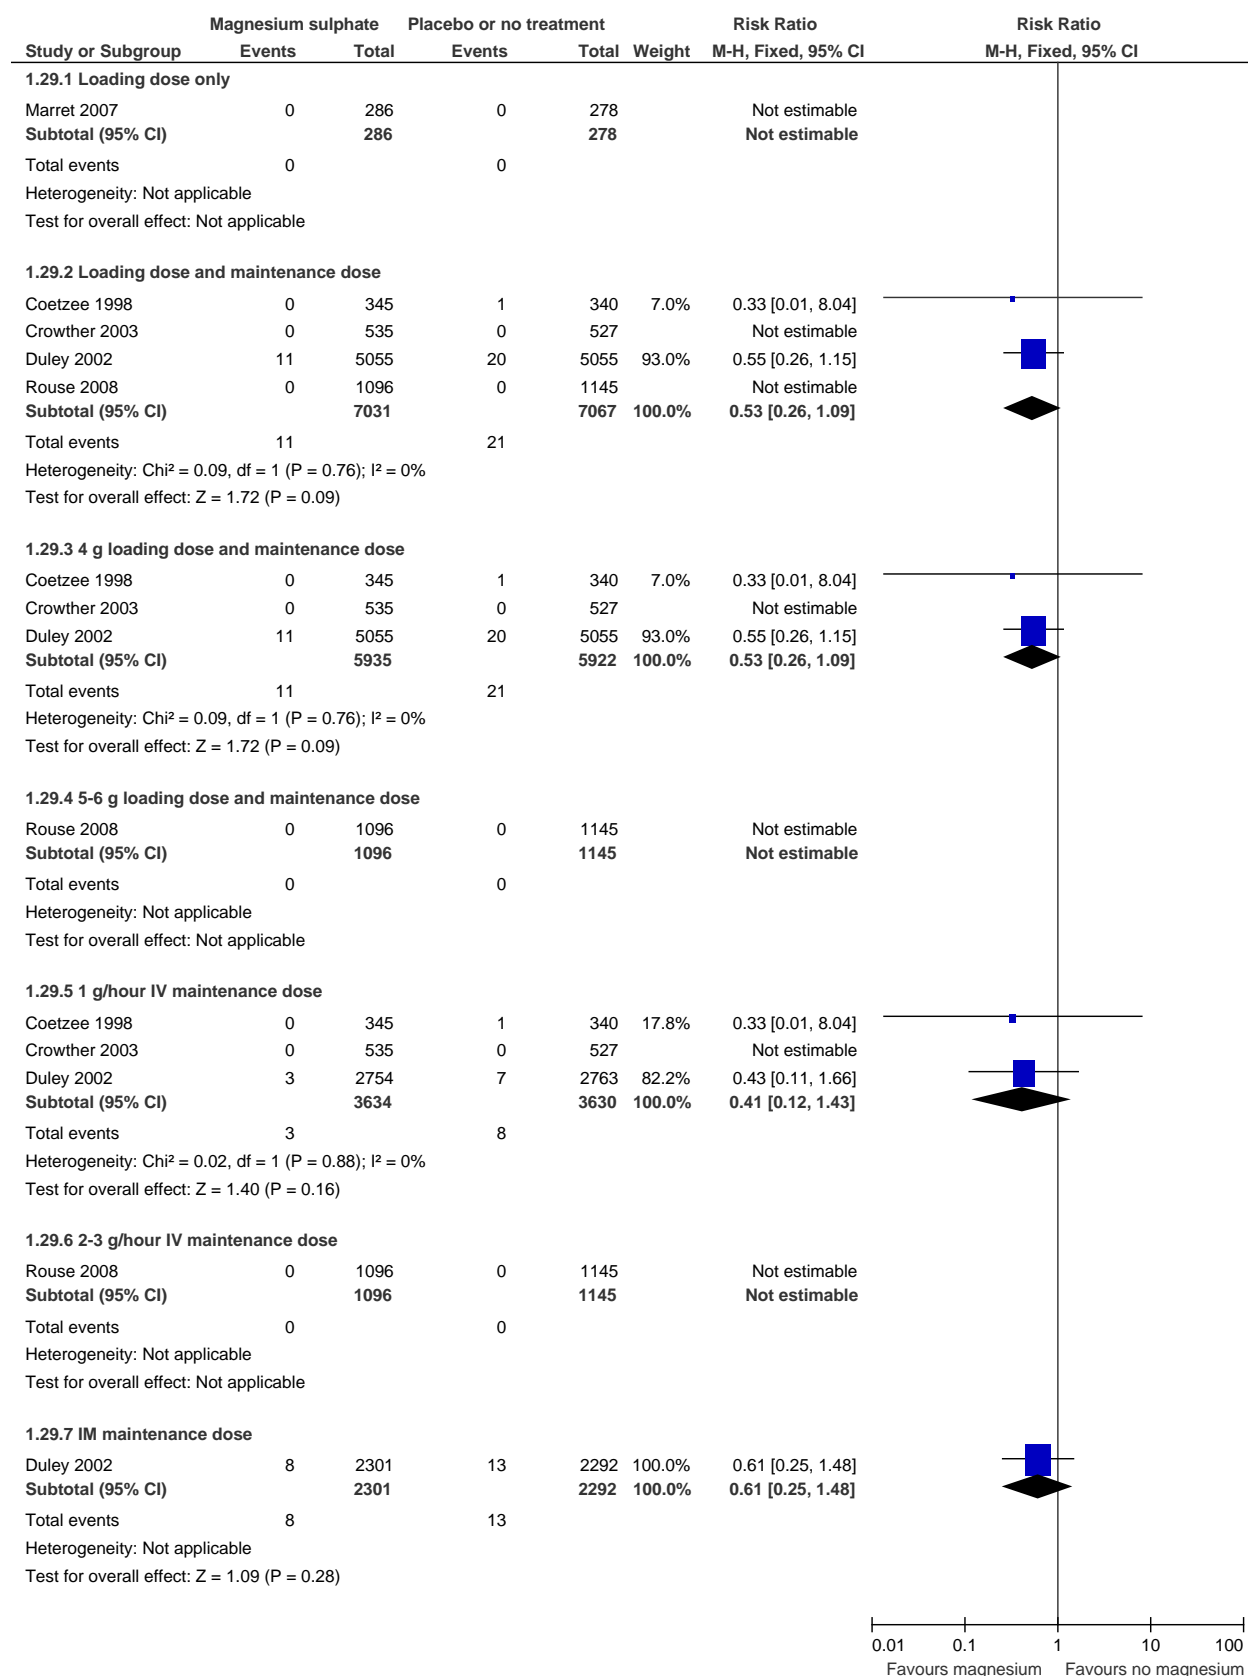

**Figure A24. Forest plot of Comparison: 1 By dose and route of administration, outcome: 1.29 Death**

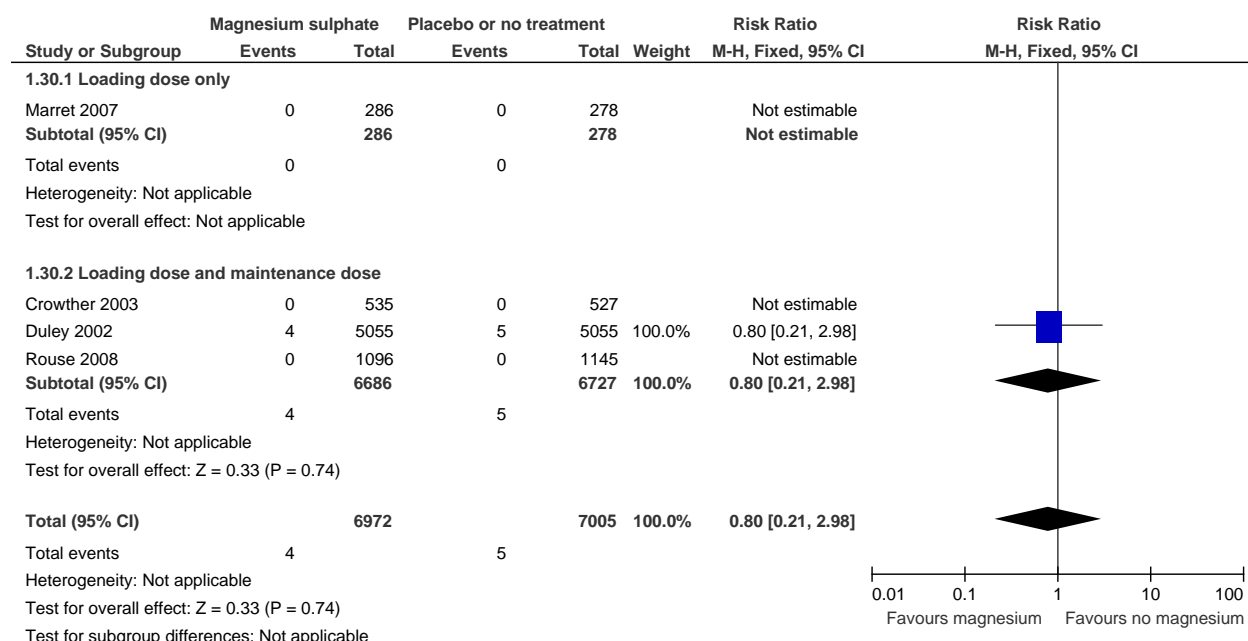

**Figure A25. Forest plot of Comparison: 1 By dose and route of administration, outcome: 1.30 Cardiac arrest**

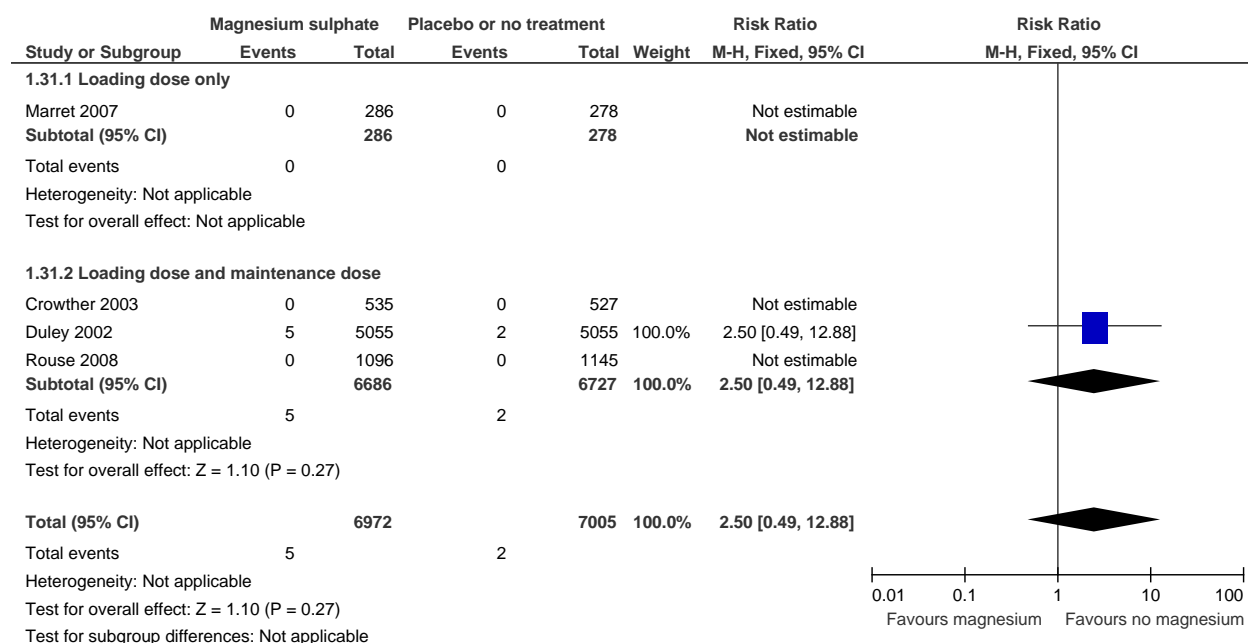

**Figure A26. Forest plot of Comparison: 1 By dose and route of administration, outcome: 1.31 Respiratory arrest**

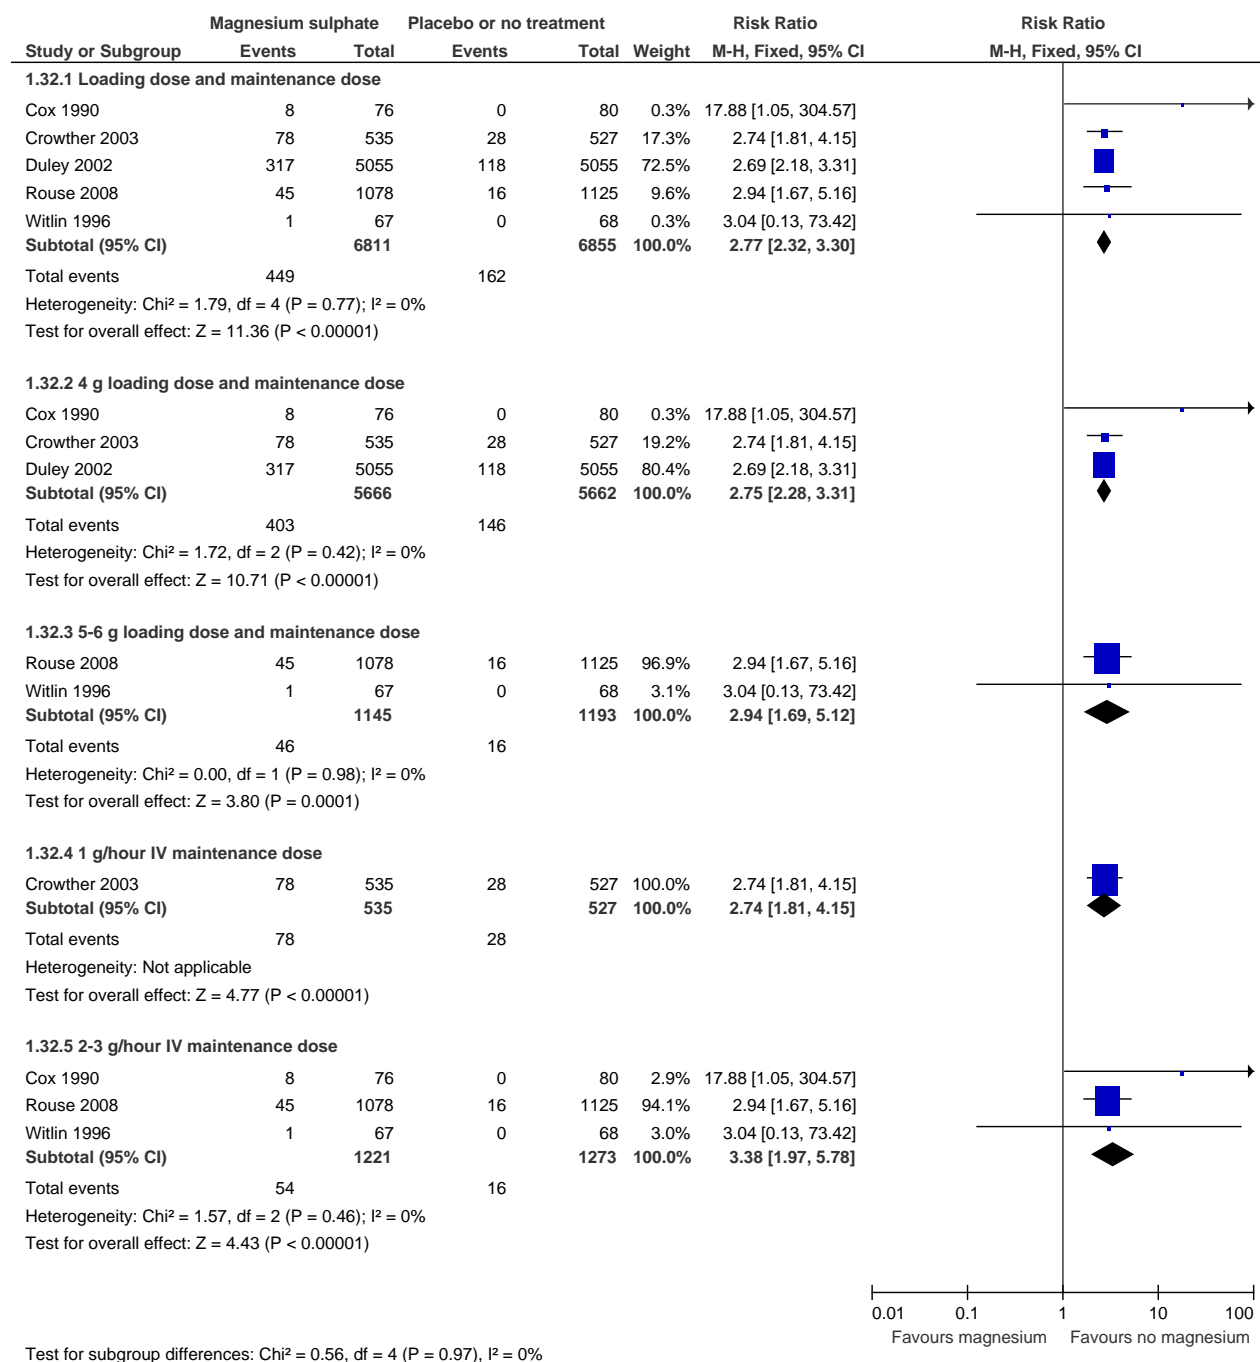

**Figure A27. Forest plot of Comparison: 1 By dose and route of administration, outcome: 1.32 Discontinuation due to adverse effects**

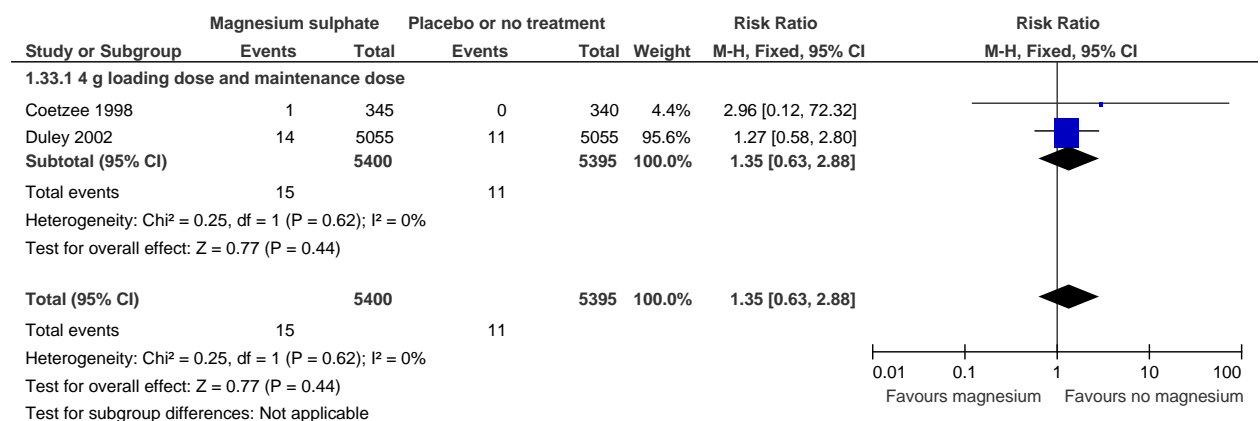

**Figure A28. Forest plot of Comparison: 1 By dose and route of administration, outcome: 1.33 Given calcium gluconate**

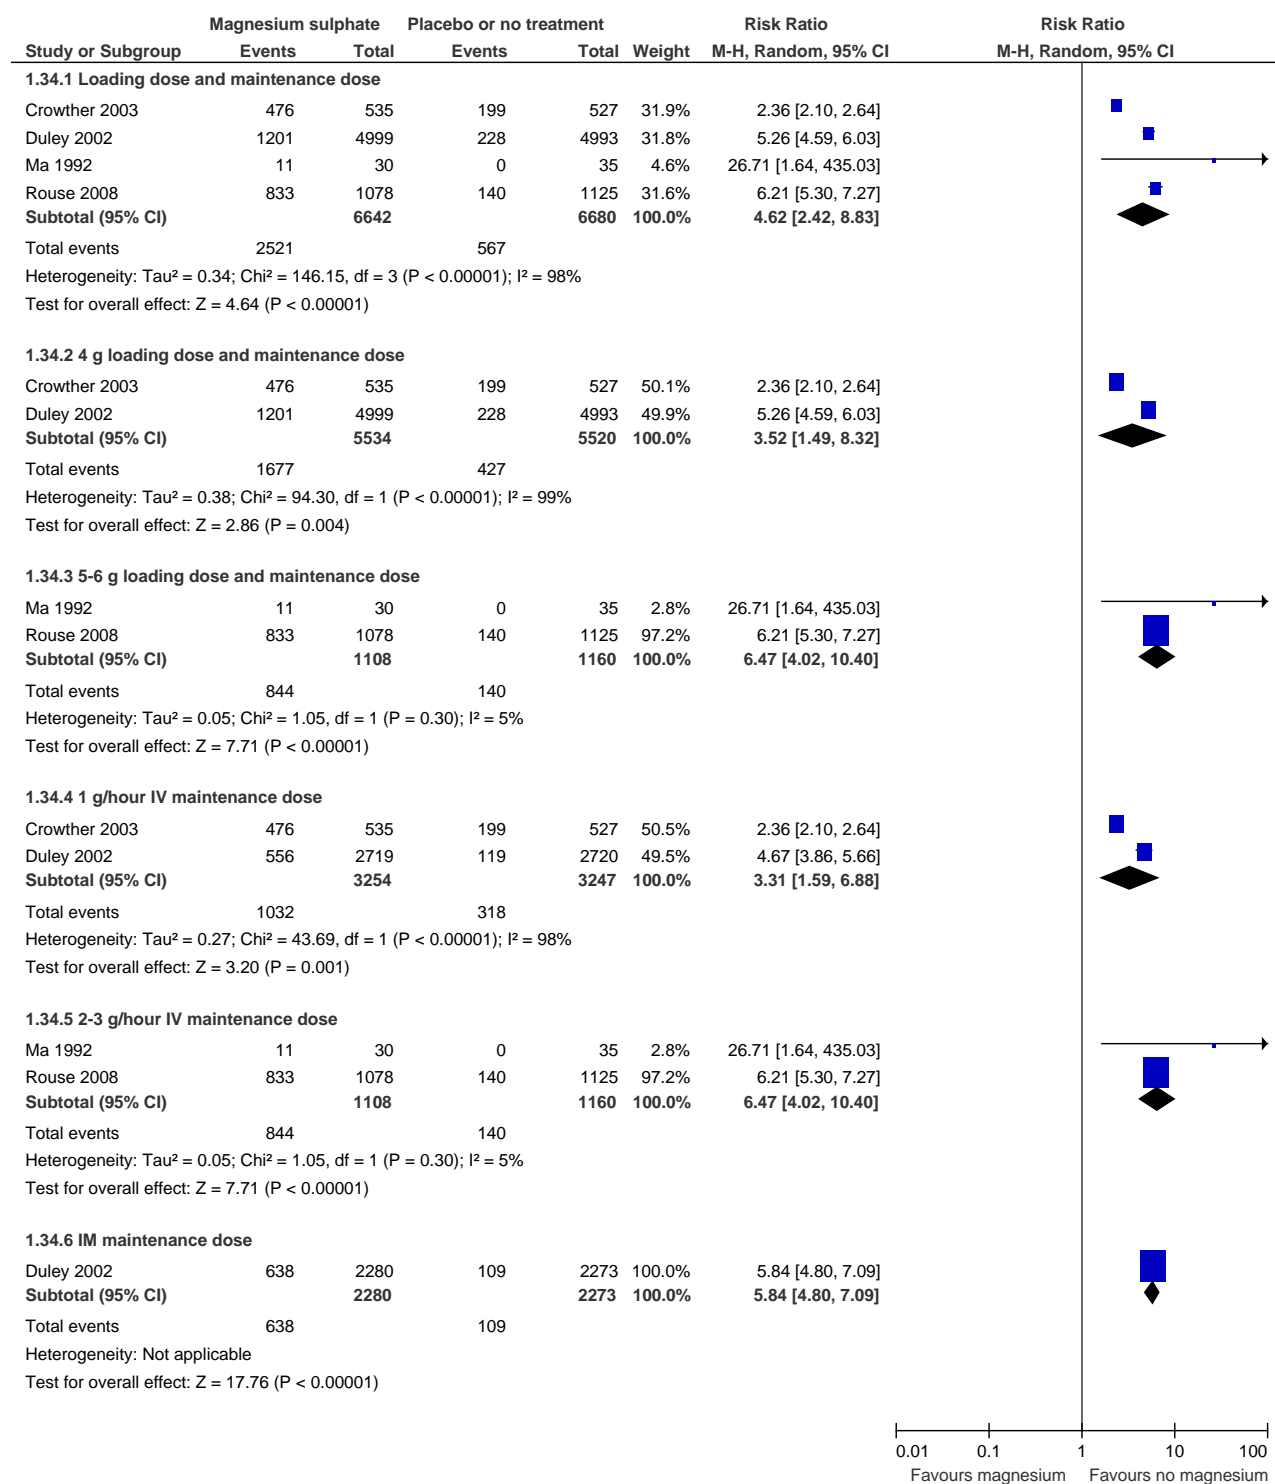

**Figure A29. Forest plot of Comparison: 1 By dose and route of administration, outcome: 1.34 Any side effects**

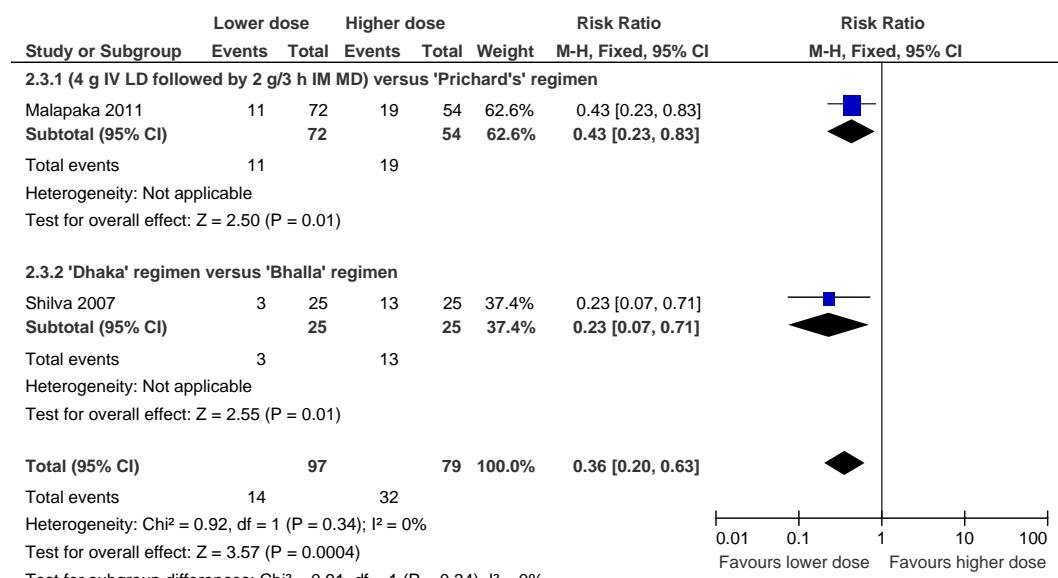

**Figure A30. Forest plot of Comparison: 2 Lower dose vs. higher dose IM regimen, outcome: 2.3 Deferred or skipped doses**

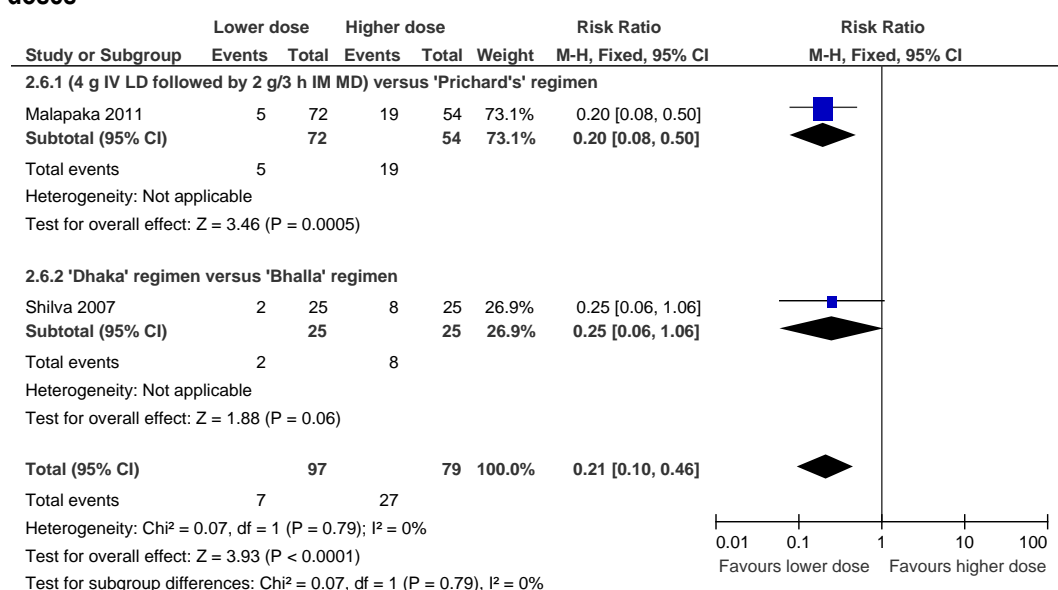

**Figure A31. Forest plot of Comparison: 2 Lower dose vs. higher dose IM regimen, outcome: 2.6 Absent tendon reflexes**

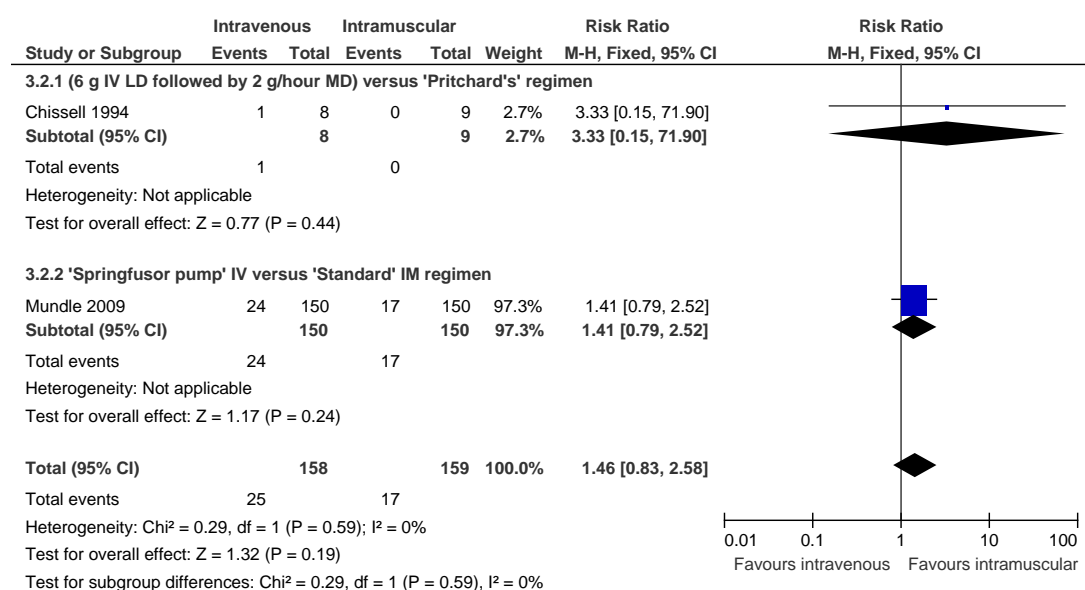

**Figure A32. Forest plot of Comparison: 3 IV maintenance vs. IM maintenance, outcome: 3.2 Discontinuation or modification of treatment**

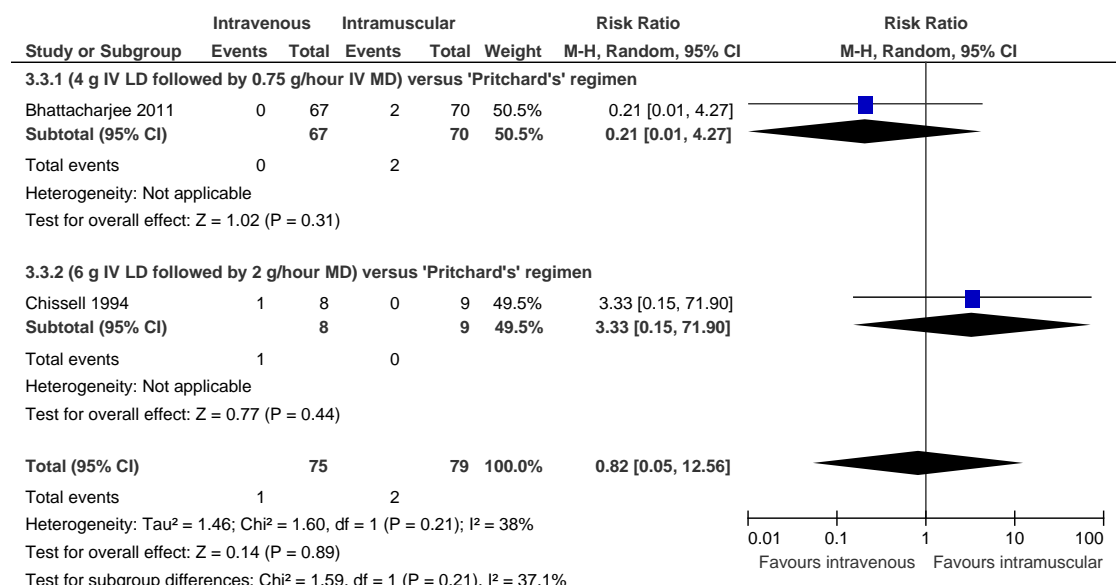

**Figure A33. Forest plot of Comparison: 3 IV maintenance vs. IM maintenance regimen, outcome: 3.3 Clinical signs of toxicity**

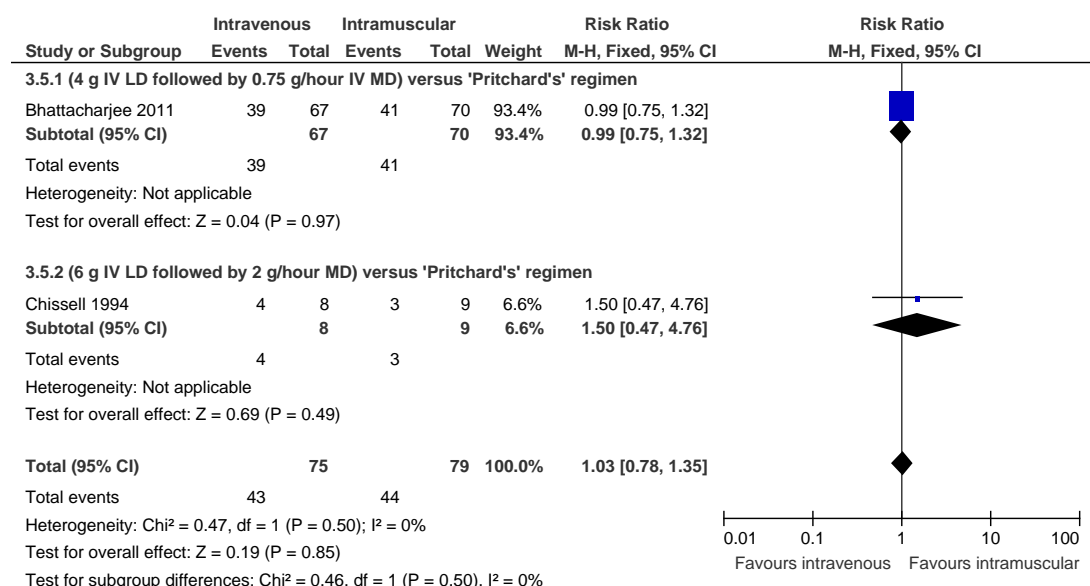

**Figure A34. Forest plot of Comparison: 3 IV maintenance vs. IM maintenance regimen, outcome: 3.5 Caesarean**

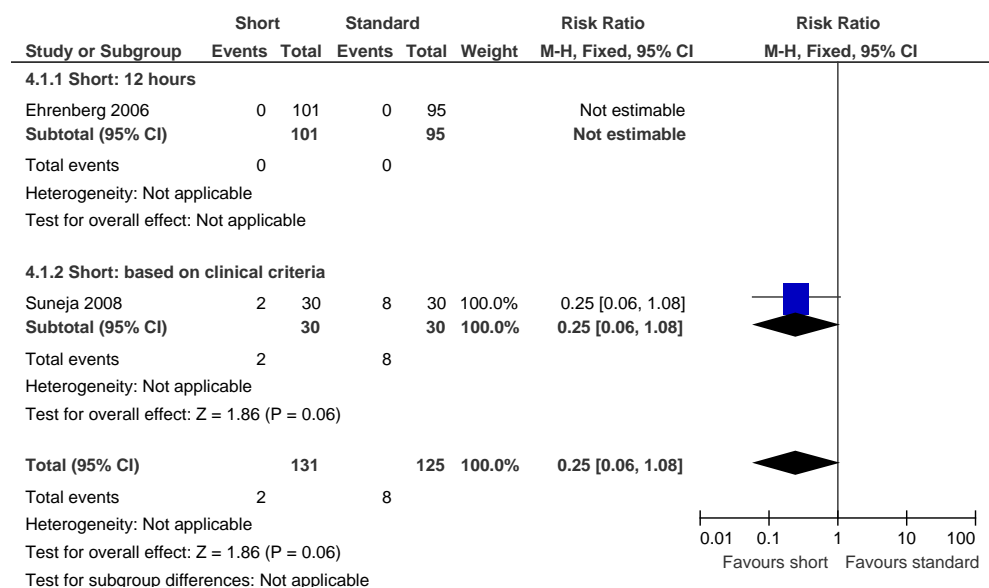

**Figure A35. Forest plot of Comparison: 4 Short vs. Standard (24 hour) postpartum maintenance therapy, outcome: 6.1 Toxicity**



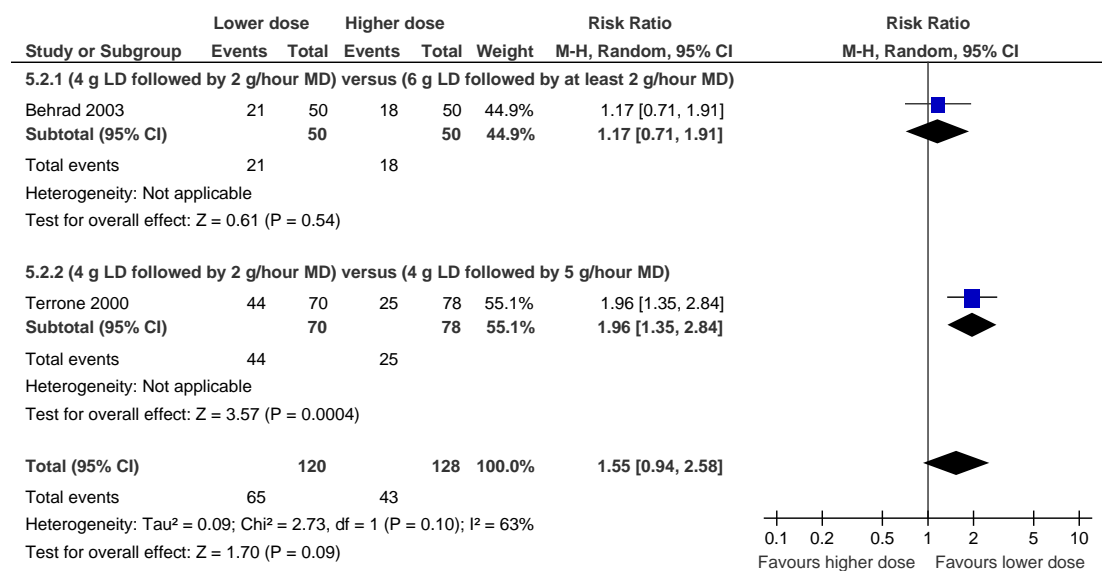

**Figure A36. Forest plot of Comparison: 5 Lower dose vs. higher dose IV regimen, outcome: 5.2 No side effects**

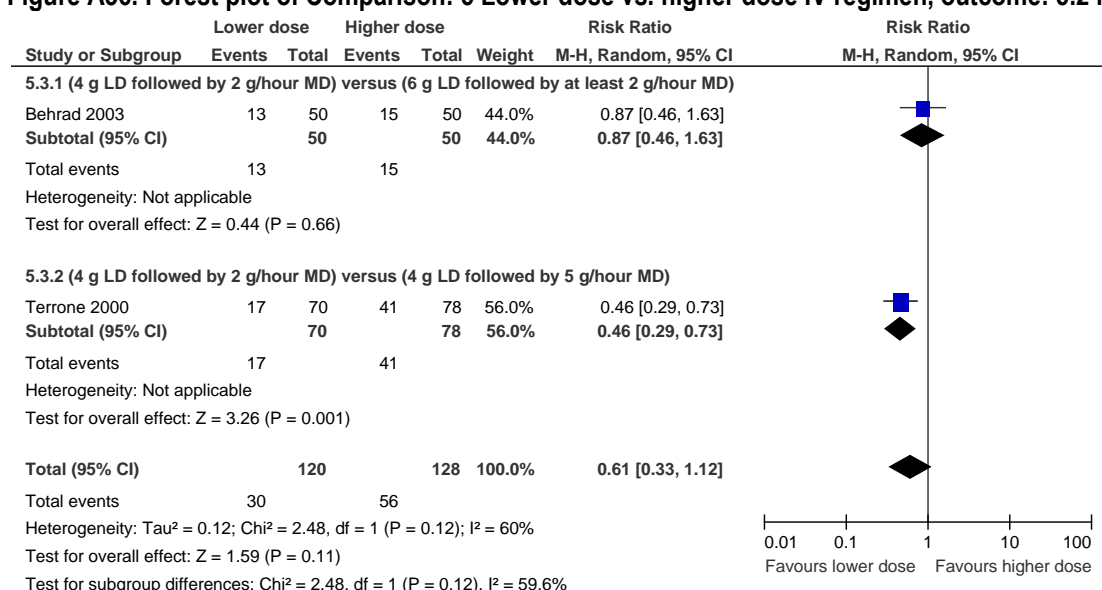

**Figure A36. Forest plot of Comparison: 5 Lower dose vs. higher dose IV regimen, outcome: 5.3 Flushing**

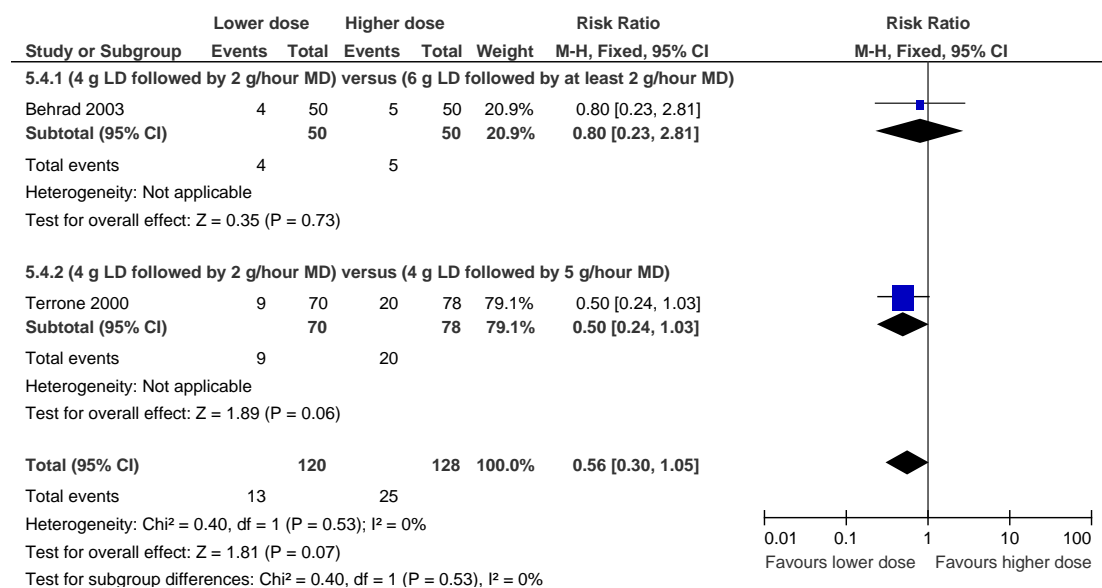

**Figure A38. Forest plot of Comparison: 5 Lower dose vs. higher dose IV regimen, outcome: 5.5 Headache**

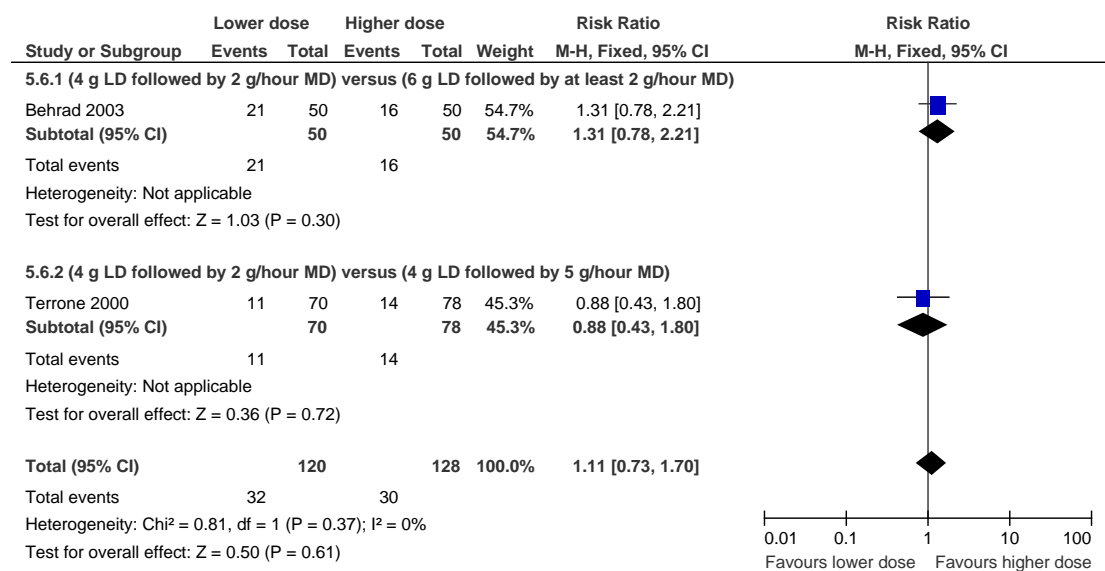

**Figure A39. Forest plot of Comparison: 5 Lower dose vs. higher dose IV regimen, outcome: 5.6 Caesarean**

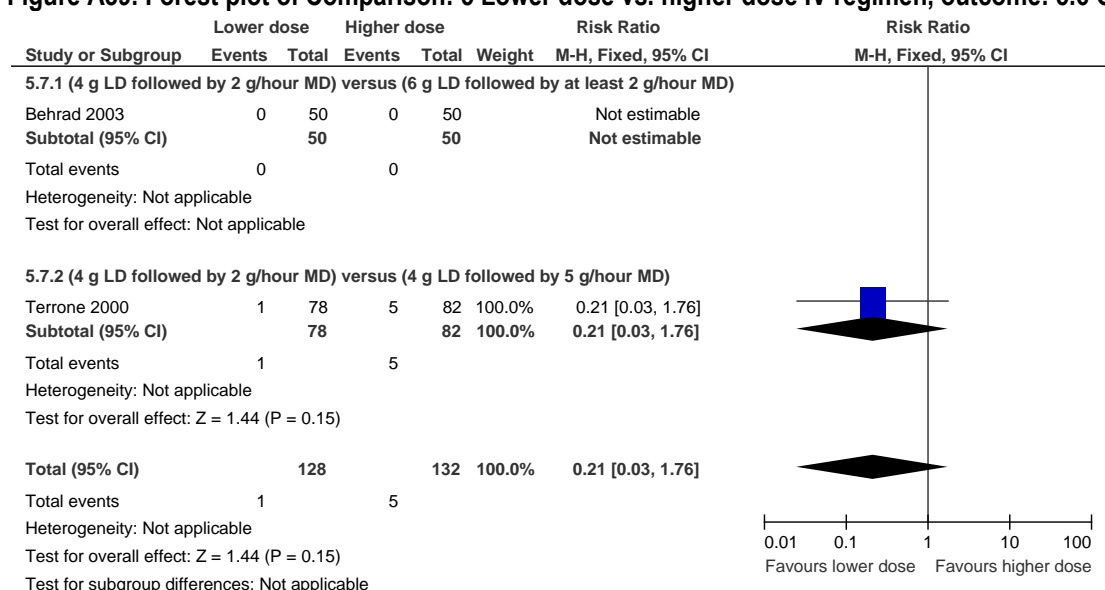

**Figure A40. Forest plot of Comparison: 5 Lower dose vs. higher dose IV regimen, outcome: 5.7 Pulmonary oedema**
